# Supplementary figures and images for: Strong decrease in viscosity of nanoparticle-filled polymer melts through selective adsorption
Source: Royal Society of Chemistry journal article supplement (doi:10.1039/b802905a), 2008-01-01

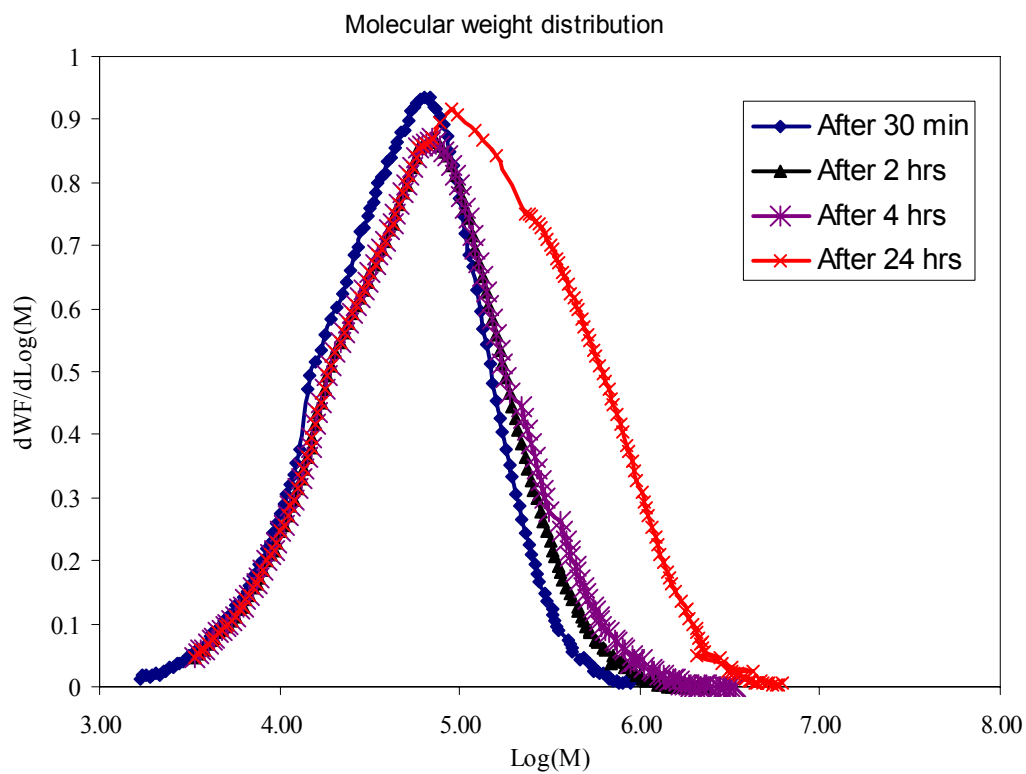

Supplement: b802905a.pdf [file b802905a.pdf]
